# Supplementary material
Source: publisher figshare collection journal article supplement (https://frontiersin.figshare.com/ndownloader/files/26573291)
Supplement: Supplementary file 1 [file 26573291]

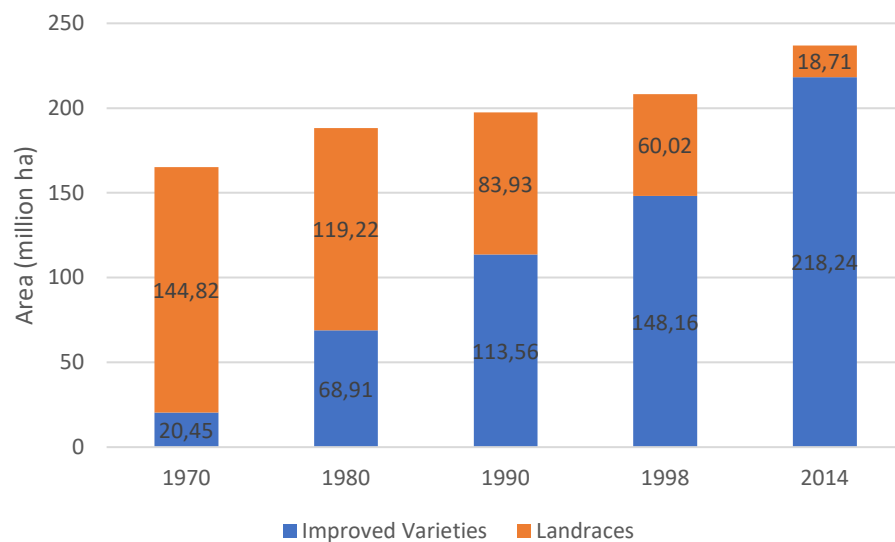

**Supplementary Figure 1. Total Area and Area Planted to Improved Varieties and Landraces in Asia between 1970–2014.** Own calculations based on Evenson and Gollin (2003a), DIIVA, TRIVSA, and SIAC databases.
